# Supplementary material for: Preparation, Characterization, and In Vitro Release of Curcumin-Loaded IRMOF-10 Nanoparticles and Investigation of Their Pro-Apoptotic Effects on Human Hepatoma HepG2 Cells
Source: MDPI journal article supplement (doi:10.3390/molecules27123940), 2022-06-20
Supplement: s1 [file s1]

**Table S1.** Orthogonal tests factors.

| Level | Factor |              |                   |
|-------|--------|--------------|-------------------|
|       | A      | B            | C                 |
|       | Time   | IRMOF-10/CUR | CUR concentration |
| 1     | 6h     | 3:2          | 1mg/ml            |
| 2     | 12h    | 1:1          | 2mg/ml            |
| 3     | 24h    | 2:3          | 3mg/ml            |

**Table S2.** Orthogonal test results

| Group | A      | B      | C      | Drug loading/% |
|-------|--------|--------|--------|----------------|
| 1     | 2      | 1      | 3      | 41.01%         |
| 2     | 2      | 3      | 2      | 61.67%         |
| 3     | 1      | 3      | 3      | 65.96%         |
| 4     | 3      | 3      | 1      | 63.29%         |
| 5     | 1      | 1      | 1      | 10.01%         |
| 6     | 2      | 2      | 1      | 43.67%         |
| 7     | 3      | 1      | 2      | 41.30%         |
| 8     | 3      | 2      | 3      | 51.94%         |
| 9     | 1      | 2      | 2      | 55.85%         |
| K1    | 43.940 | 30.773 | 38.990 |                |
| K2    | 48.783 | 50.487 | 52.940 |                |
| K3    | 52.177 | 63.640 | 52.970 |                |
| R     | 8.237  | 32.867 | 13.980 |                |

**Table S3.** Analysis of variance for the orthogonal test results

| Source of Variance   | SS       | df | variance | F     | P     |
|----------------------|----------|----|----------|-------|-------|
| A(Time)              | 102.815  | 2  | 51.408   | 0.427 | 0.701 |
| B(IRMOF-10/CUR)      | 1641.843 | 2  | 820.922  | 6.824 | 0.128 |
| C(CUR concentration) | 390.044  | 2  | 195.022  | 1.621 | 0.382 |
| Error                | 240.587  | 2  | 120.294  |       |       |

PS:  $P < 0.05$  means the difference is significant,  $P < 0.01$  means the difference is extremely significant

Results: Taking the drug loading as the inspection index, the results of the analysis of variance showed that B (IRMOF-10/CUR) had a significant difference on the experimental results, and A (Time) and C (CUR concentration) had no significant effects. The influence of various factors on the experimental results is  $B > C > A$ . According to the intuitive analysis of the orthogonal table, the optimal drug loading conditions are:  $A_3B_3C_3$ , that is, drug loading for 24 h, IRMOF-10/CUR is 2:3, and CUR concentration is 3 mg/mL.

**Table S4.** Validation experiment results under the optimum conditions

| Number | DLC (%) | Average Value (%) | RSD (%) |
|--------|---------|-------------------|---------|
| 1      | 62.93   | 63.96             | 1.15    |
| 2      | 64.67   |                   |         |
| 3      | 64.16   |                   |         |
| 4      | 64.10   |                   |         |

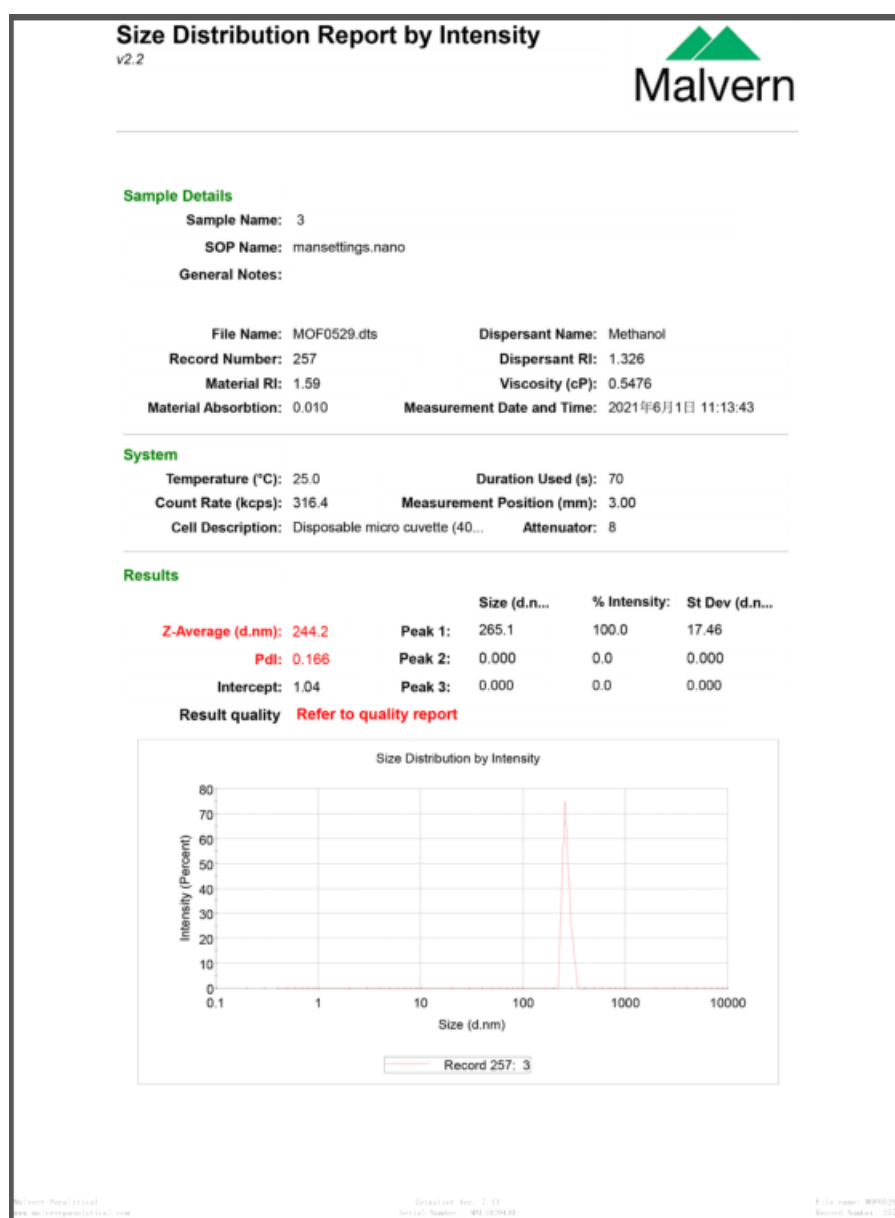**Figure S1:** Size distribution report of IRMOF-10.

## Size Distribution Report by Intensity

v2.2

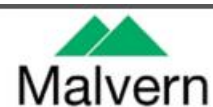

### Sample Details

Sample Name: 1

SOP Name: mansettings.nano

General Notes:

File Name: MOF0529.dts

Dispersant Name: Methanol

Record Number: 288

Dispersant RI: 1.326

Material RI: 1.59

Viscosity (cP): 0.5476

Material Absorption: 0.010

Measurement Date and Time: 2021年6月1日 17:07:13

### System

Temperature (°C): 25.0

Duration Used (s): 70

Count Rate (kcps): 206.6

Measurement Position (mm): 3.00

Cell Description: Disposable micro cuvette (40...

Attenuator: 8

### Results

|                                | Size (d.n...         | % Intensity: | St Dev (d.n... |
|--------------------------------|----------------------|--------------|----------------|
| <b>Z-Average (d.nm):</b> 255.9 | <b>Peak 1:</b> 275.8 | 100.0        | 20.14          |
| <b>Pdl:</b> 0.243              | <b>Peak 2:</b> 0.000 | 0.0          | 0.000          |
| <b>Intercept:</b> 1.29         | <b>Peak 3:</b> 0.000 | 0.0          | 0.000          |

Result quality **Refer to quality report**

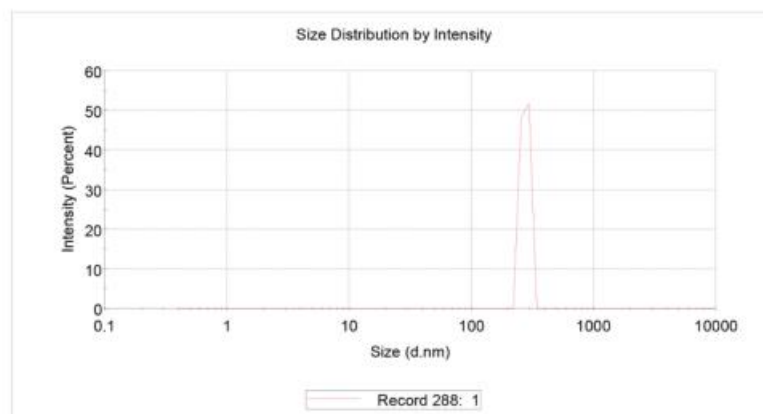

**Figure S2:** Size distribution report of CUR@IRMOF-10.

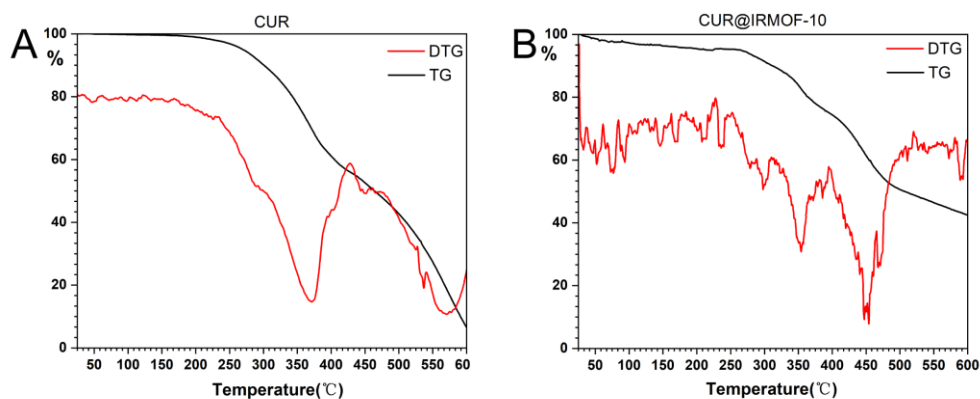

**Figure S3:** Differential Thermogravimetric Curve (DTG) of CUR(A) and CUR@IRMOF-10(B).

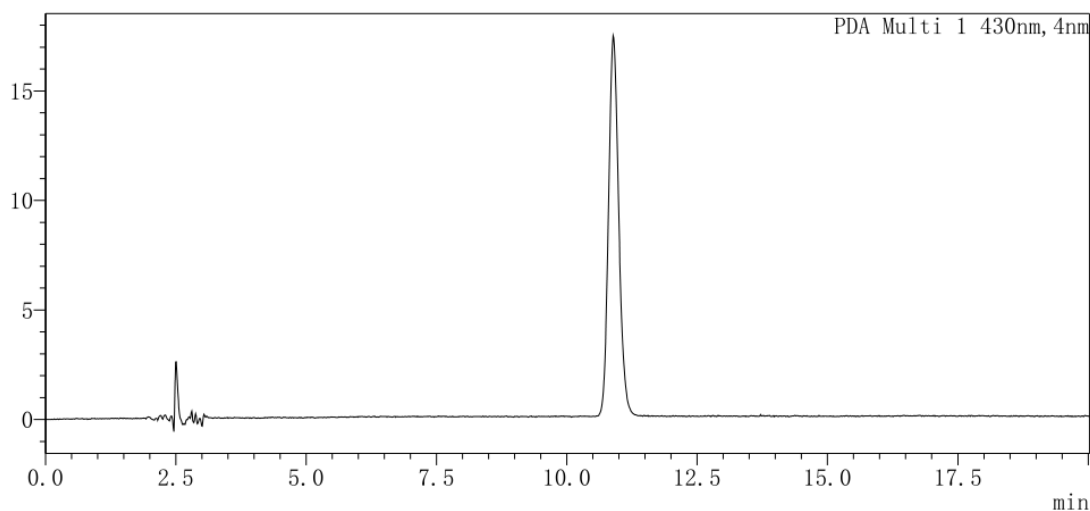

**Figure S4:** High Performance Liquid Chromatography (HPLC) of CUR

Method: Using a reversed phase column, Agilent ZORBAX SB-C18 (250mm×4.6mm, 5μm). The liquid chromatography system was LC-20A high performance liquid chromatograph equipped with a DAD diode array detector. Acetonitrile-4% glacial acetic acid solution (48:52) is used as mobile phase. The flow rate was constant at 1 mL/min, the injection volume was 10 μL, and samples were maintained at 25 °C. Detection wavelength was 430 nm.

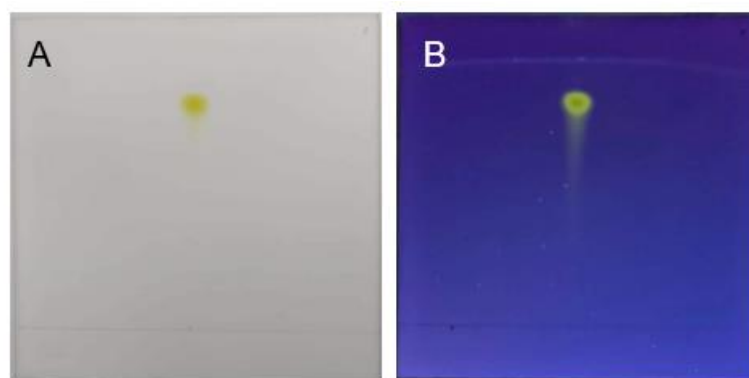

**Figure S5:** Thin Layer Chromatography (TLC) of CUR in Visible(A) and UV Light(365 nm)(B)

Method: Apply 4  $\mu\text{L}$  of CUR solution (0.5 mg/mL) on a silica gel G thin-layer plate, and use chloroform:methanol:formic acid (96:4:0.7) as the mobile phase. The thin-layer plate is placed under sunlight and ultraviolet light(365 nm). respectively.

A

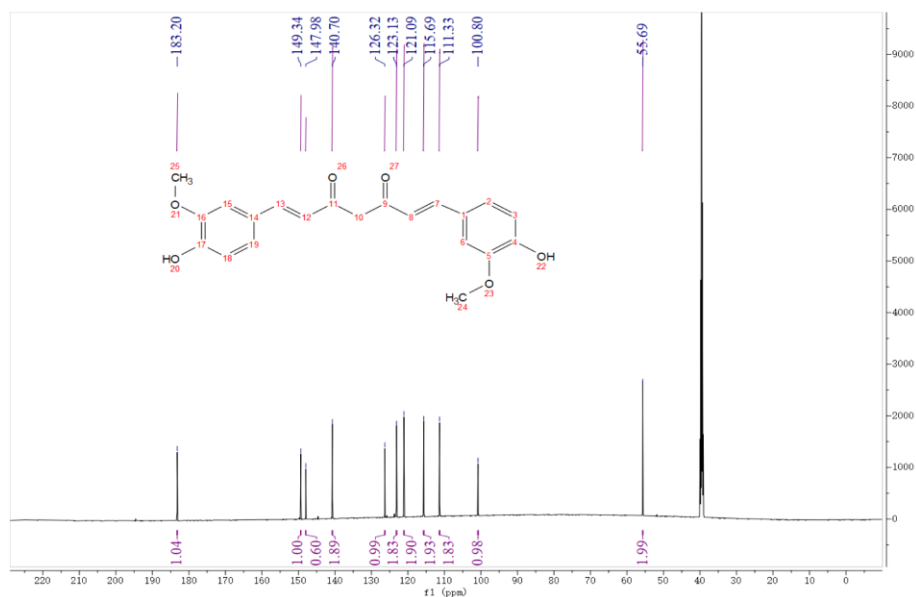

B

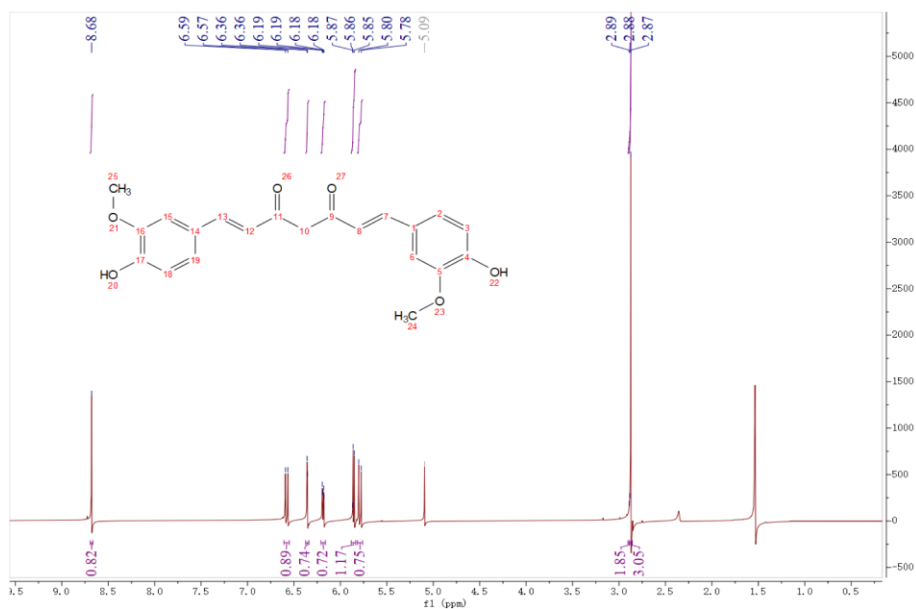

**Figure S6:** <sup>1</sup>H NMR and <sup>13</sup>C NMR spectra of CUR

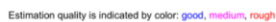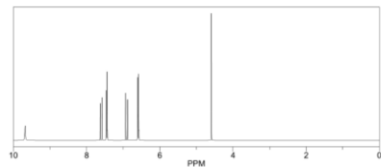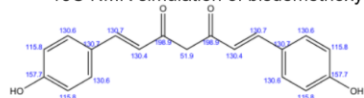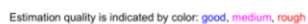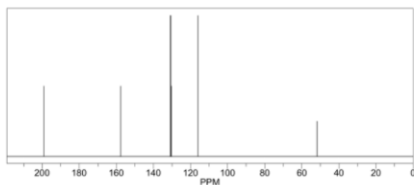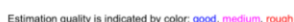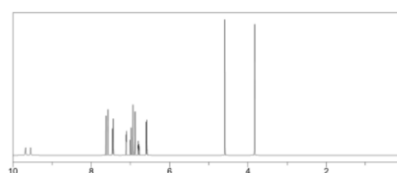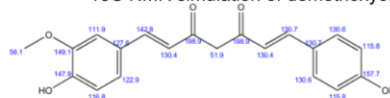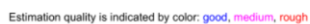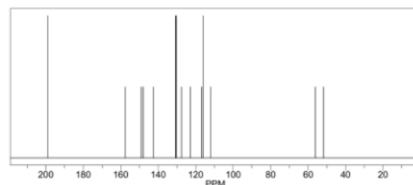

**Figure S7:**  $^1\text{H}$  NMR and  $^{13}\text{C}$  NMR spectra of bisdemethoxycurcumin and demethoxycurcumin
